# Supplementary material
Source: HighWire-hosted journal article supplement (https://www.cmajopen.ca/highwire/filestream/81157/field_highwire_adjunct_files/2/strobe.pdf)
Supplement: strobe.pdf [file strobe.pdf]

Supplemental Table 1.

Strengthening the reporting of observational studies in epidemiology (STROBE) guideline checklist of items that should be included in scientific studies.

|                           | <b>Item No.</b> | <b>Recommendation</b>                                                                                                                                                                                                                                                                                                                                                                                                                                                  | <b>Page No.</b> |
|---------------------------|-----------------|------------------------------------------------------------------------------------------------------------------------------------------------------------------------------------------------------------------------------------------------------------------------------------------------------------------------------------------------------------------------------------------------------------------------------------------------------------------------|-----------------|
| <b>Title and abstract</b> | 1               | (a) Indicate the study's design with a commonly used term in the title or the abstract                                                                                                                                                                                                                                                                                                                                                                                 | 2               |
|                           |                 | (b) Provide in the abstract an informative and balanced summary of what was done and what was found                                                                                                                                                                                                                                                                                                                                                                    | 2               |
| <b>Introduction</b>       |                 |                                                                                                                                                                                                                                                                                                                                                                                                                                                                        |                 |
| Background/rationale      | 2               | Explain the scientific background and rationale for the investigation being reported                                                                                                                                                                                                                                                                                                                                                                                   | 3               |
| Objectives                | 3               | State specific objectives, including any prespecified hypotheses                                                                                                                                                                                                                                                                                                                                                                                                       | 3               |
| <b>Methods</b>            |                 |                                                                                                                                                                                                                                                                                                                                                                                                                                                                        |                 |
| Study design              | 4               | Present key elements of study design early in the paper                                                                                                                                                                                                                                                                                                                                                                                                                | 3,4             |
| Setting                   | 5               | Describe the setting, locations, and relevant dates, including periods of recruitment, exposure, follow-up, and data collection                                                                                                                                                                                                                                                                                                                                        | 3,4             |
| Participants              | 6               | (a) <i>Cohort study</i> —Give the eligibility criteria, and the sources and methods of selection of participants. Describe methods of follow-up<br><i>Case-control study</i> —Give the eligibility criteria, and the sources and methods of case ascertainment and control selection. Give the rationale for the choice of cases and controls<br><i>Cross-sectional study</i> —Give the eligibility criteria, and the sources and methods of selection of participants | 3,4             |
|                           |                 | (b) <i>Cohort study</i> —For matched studies, give matching criteria and number of exposed and unexposed<br><i>Case-control study</i> —For matched studies, give matching criteria and the number of controls per case                                                                                                                                                                                                                                                 |                 |

|                              |     |                                                                                                                                                                                                                                                                                                           |         |
|------------------------------|-----|-----------------------------------------------------------------------------------------------------------------------------------------------------------------------------------------------------------------------------------------------------------------------------------------------------------|---------|
| Variables                    | 7   | Clearly define all outcomes, exposures, predictors, potential confounders, and effect modifiers. Give diagnostic criteria, if applicable                                                                                                                                                                  | 4       |
| Data sources/<br>measurement | 8*  | For each variable of interest, give sources of data and details of methods of assessment (measurement). Describe comparability of assessment methods if there is more than one group                                                                                                                      | 4       |
| Bias                         | 9   | Describe any efforts to address potential sources of bias                                                                                                                                                                                                                                                 | 4       |
| Study size                   | 10  | Explain how the study size was arrived at                                                                                                                                                                                                                                                                 | 3,4     |
| Quantitative<br>variables    | 11  | Explain how quantitative variables were handled in the analyses. If applicable, describe which groupings were chosen and why                                                                                                                                                                              | 4,5     |
| Statistical<br>methods       | 12  | (a) Describe all statistical methods, including those used to control for confounding                                                                                                                                                                                                                     | 4,5     |
|                              |     | (b) Describe any methods used to examine subgroups and interactions                                                                                                                                                                                                                                       | 4,5     |
|                              |     | (c) Explain how missing data were addressed                                                                                                                                                                                                                                                               |         |
|                              |     | (d) <i>Cohort study</i> —If applicable, explain how loss to follow-up was addressed<br><i>Case-control study</i> —If applicable, explain how matching of cases and controls was addressed<br><i>Cross-sectional study</i> —If applicable, describe analytical methods taking account of sampling strategy | 5       |
|                              |     | (e) Describe any sensitivity analyses                                                                                                                                                                                                                                                                     |         |
| Participants                 | 13* | (a) Report numbers of individuals at each stage of study—eg numbers potentially eligible, examined for eligibility, confirmed eligible, included in the study, completing follow-up, and analysed                                                                                                         | 3       |
|                              |     | (b) Give reasons for non-participation at each stage                                                                                                                                                                                                                                                      |         |
|                              |     | (c) Consider use of a flow diagram                                                                                                                                                                                                                                                                        |         |
| Descriptive data             | 14* | (a) Give characteristics of study participants (eg demographic, clinical, social) and information on exposures and potential confounders                                                                                                                                                                  | 5,14,15 |
|                              |     | (b) Indicate number of participants with missing data for each variable of interest                                                                                                                                                                                                                       |         |
|                              |     | (c) <i>Cohort study</i> —Summarise follow-up time (eg, average and total amount)                                                                                                                                                                                                                          |         |
| Outcome data                 | 15* | <i>Cohort study</i> —Report numbers of outcome events or summary measures over time                                                                                                                                                                                                                       |         |

|                          |    |                                                                                                                                                                                                              |           |
|--------------------------|----|--------------------------------------------------------------------------------------------------------------------------------------------------------------------------------------------------------------|-----------|
|                          |    | <i>Case-control study</i> —Report numbers in each exposure category, or summary measures of exposure                                                                                                         |           |
|                          |    | <i>Cross-sectional study</i> —Report numbers of outcome events or summary measures                                                                                                                           | 5,6       |
| Main results             | 16 | (a) Give unadjusted estimates and, if applicable, confounder-adjusted estimates and their precision (eg, 95% confidence interval). Make clear which confounders were adjusted for and why they were included | 5,6,16-18 |
|                          |    | (b) Report category boundaries when continuous variables were categorized                                                                                                                                    |           |
|                          |    | (c) If relevant, consider translating estimates of relative risk into absolute risk for a meaningful time period                                                                                             |           |
| Other analyses           | 17 | Report other analyses done—eg analyses of subgroups and interactions, and sensitivity analyses                                                                                                               | 5,6,19    |
| Key results              | 18 | Summarise key results with reference to study objectives                                                                                                                                                     | 6         |
| Limitations              | 19 | Discuss limitations of the study, taking into account sources of potential bias or imprecision. Discuss both direction and magnitude of any potential bias                                                   | 6,7       |
| Interpretation           | 20 | Give a cautious overall interpretation of results considering objectives, limitations, multiplicity of analyses, results from similar studies, and other relevant evidence                                   | 7         |
| Generalisability         | 21 | Discuss the generalisability (external validity) of the study results                                                                                                                                        | 6,7       |
| <b>Other information</b> |    |                                                                                                                                                                                                              |           |
| Funding                  | 22 | Give the source of funding and the role of the funders for the present study and, if applicable, for the original study on which the present article is based                                                | 8         |

*Note.* This table was obtained directly from the STROBE statement website, but modified for the current study.
